# Supplementary material for: ADRA2A and IRX1 are putative risk genes for Raynaud’s phenomenon
Source: PubMed Central journal article supplement (PMC10570309; doi:10.1038/s41467-023-41876-5), 2023-10-12
Supplement: 41467_2023_41876_MOESM1_ESM.pdf [file 41467_2023_41876_MOESM1_ESM.pdf]

# Supplementary Tables and Figures

## ***ADRA2A* and *IRX1* are putative risk genes for Raynaud's phenomenon**

Sylvia Hartmann<sup>1</sup>, Summaira Yasmeen<sup>1</sup>, Benjamin M Jacobs<sup>2</sup>, Spiros Denaxas<sup>3,4,5,6</sup>, Munir Pirmohamed<sup>7</sup>, Eric R. Gamazon<sup>8</sup>, Mark J. Caulfield<sup>9</sup>, Genes & Health Research Team, Harry Hemingway<sup>3,4,6</sup>, Maik Pietzner<sup>1,10,11\*</sup>, Claudia Langenberg<sup>1,10,11,\*</sup>

<sup>1</sup>Computational Medicine, Berlin Institute of Health at Charité – Universitätsmedizin Berlin, Berlin, Germany

<sup>2</sup>Preventive Neurology Unit, Wolfson Institute of Population Health, Queen Mary University of London, London, UK

<sup>3</sup>Institute of Health Informatics, University College London, London, UK

<sup>4</sup>Health Data Research UK, London, UK

<sup>5</sup>British Heart Foundation Data Science Centre, London, UK

<sup>6</sup>National Institute of Health Research University College London Hospitals Biomedical Research Centre

<sup>7</sup>Department of Pharmacology and Therapeutics, The Wolfson Centre for Personalised Medicine, University Liverpool, Liverpool, UK, Liverpool, UK

<sup>8</sup>Vanderbilt Genetics Institute, Vanderbilt University Medical Center, Nashville, TN 37203, USA

<sup>9</sup>William Harvey Research Institute, Queen Mary University of London, London, UK

<sup>10</sup>MRC Epidemiology Unit, University of Cambridge, Cambridge, UK

<sup>11</sup>Precision Healthcare Institute, Queen Mary University of London, London, UK

\*these authors jointly supervised the work

## **Correspondence**

Prof Claudia Langenberg (Claudia.langenberg@bih-charite.de)

Dr Maik Pietzner ([maik.pietzner@bih-charite.de](mailto:maik.pietzner@bih-charite.de))

## Content

|                                                                             |    |
|-----------------------------------------------------------------------------|----|
| Supplementary Figures .....                                                 | 2  |
| Supplementary Figure 1 – Inclusion criteria and primary RP definition ..... | 2  |
| Supplementary Figure 2 – Regional association plot.....                     | 3  |
| Supplementary Figure 3 – Q-Q plot .....                                     | 4  |
| Supplementary Figure 4 – Beta-correlation plot .....                        | 5  |
| Supplementary Figure 5 – Genetic correlation plot.....                      | 6  |
| Supplementary Tables .....                                                  | 7  |
| Supplementary Table 1 – Characteristics of cases and controls.....          | 7  |
| Supplementary Table 2 – OR for sex and sex*SNP interaction.....             | 8  |
| Supplementary Table 3 – Effect estimates for all and primary RP cases.....  | 9  |
| Supplementary Table 6b – Latent causal variable analysis.....               | 10 |

## Supplementary Figures

### Supplementary Figure 1 – Inclusion criteria and primary RP definition

**Flowchart for the criteria for inclusion** into the study and criteria for definition as primary Raynaud's phenomenon.

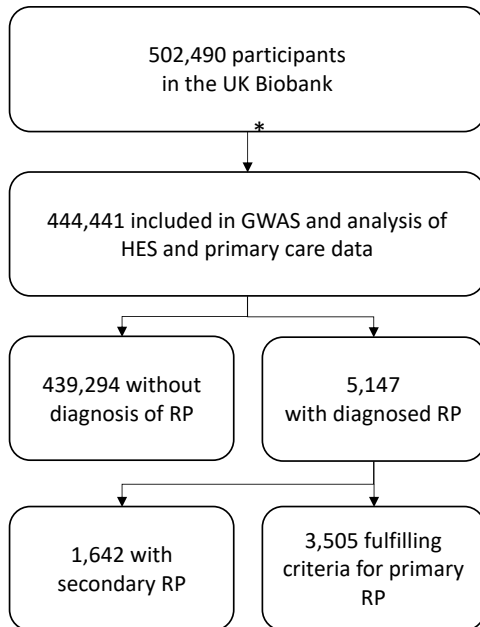

#### Criteria for primary Raynaud Phenomenon:

Prior and later to the diagnosis of RP the following diseases have never been diagnosed:

- Arteriosclerosis
- Dermatomyositis
- Polymyositis
- Systemic sclerosis
- Systemic Lupus Erythematosus
- Sjogren Syndrome
- Diseases of connective tissue
- Cryoglobulinemia
- Autoimmune haemolytic anaemias
- Carpal tunnel syndrome
- Frostbite
- Hypothyroidism
- Medication with beta blockers

RP = Raynaud phenomenon, HES = hospital episode statistics

\*Excluded due to missing genetic data, genetic data did not pass quality control, or withdrawn consent

### Supplementary Figure2 – Regional association plot

Regional association plot for variants reported in table 1 for Raynaud’s Phenomenon (RP). Each plot displays p-values from logistic regression models associating single nucleotide variants in a  $\pm 500\text{kb}$  window around the lead signal with the risk of RP. The colour gradient indicates the linkage disequilibrium ( $r^2$ ) with the lead signal (annotated) at the respective locus.

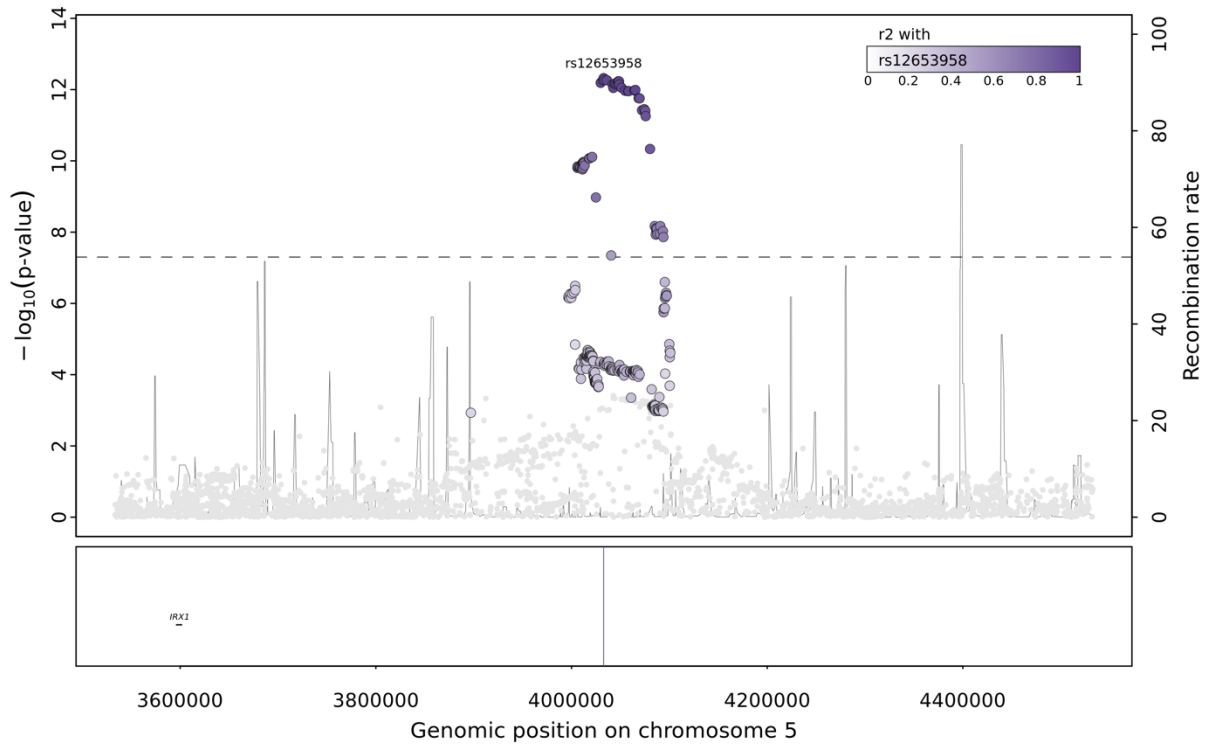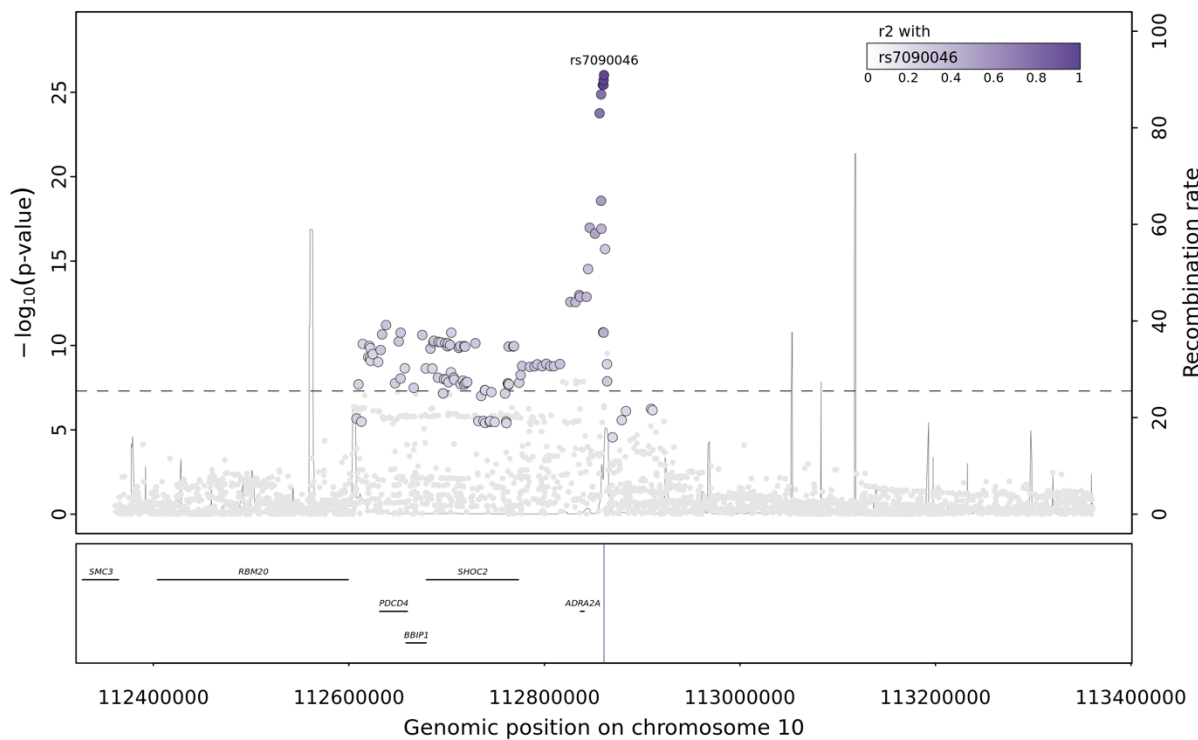

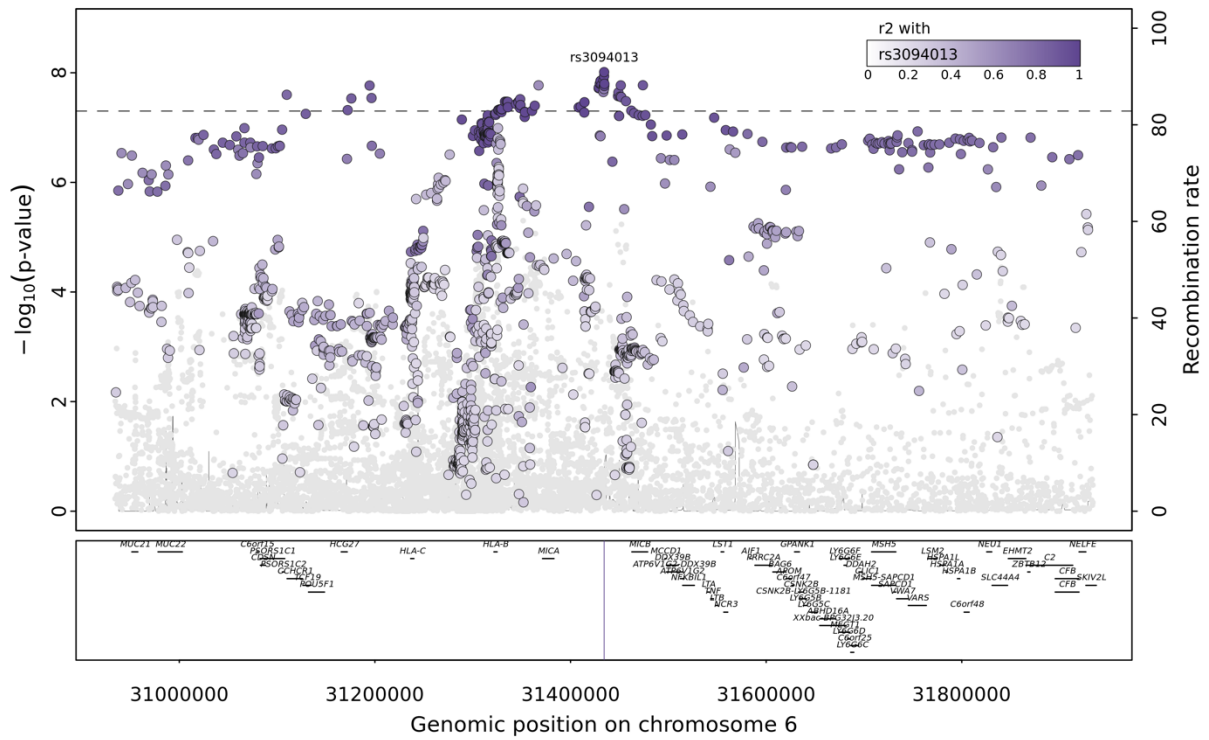

Supplementary Figure 3 – Q-Q plot  
Q-Q plot

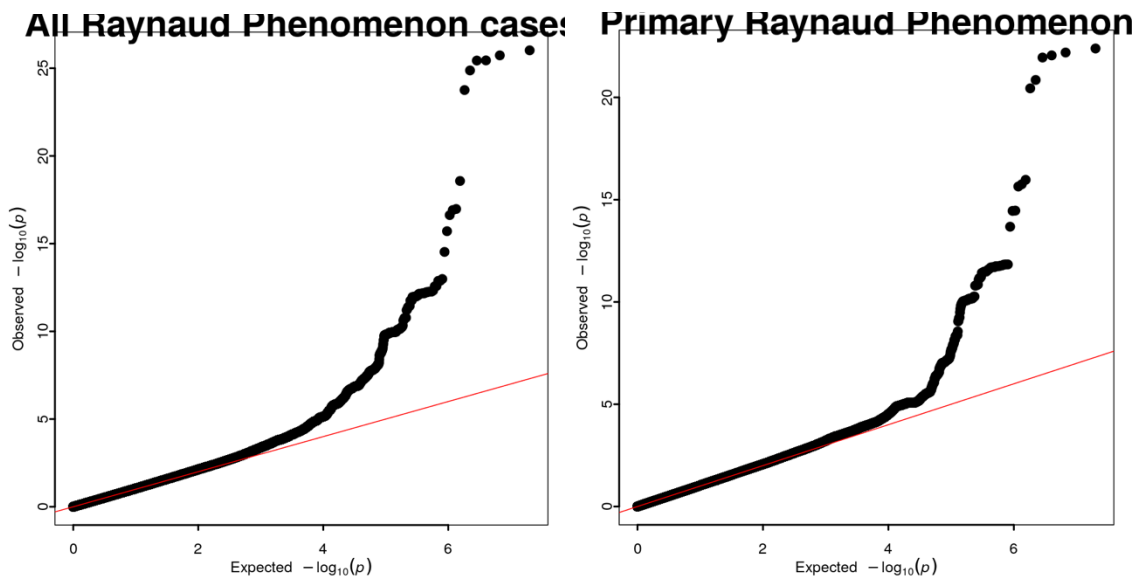

**Supplementary Figure 3** QQ-plot of the genome-wide association results for all RP cases (left) and restricting to primary RP cases (right).

Supplementary Figure 4 – Beta-correlation plot

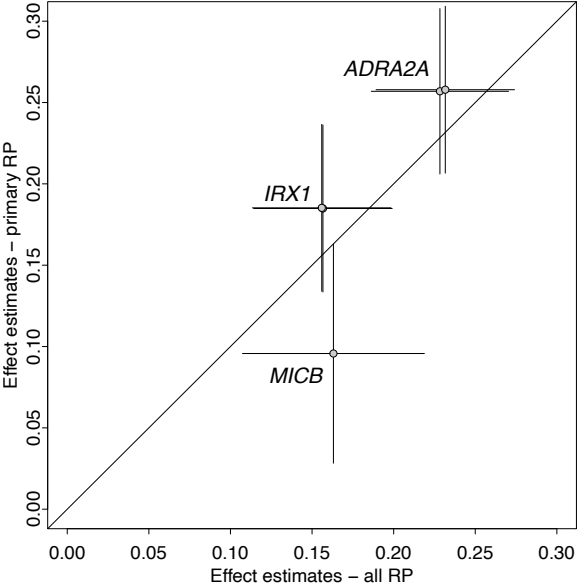

**Supplementary Figure 4** Comparison of effect estimates for three genetic loci, five distinct variants, significantly associated with RP risk among all RP cases (x-axis) and when restricting to primary RP cases only (y-axis).

Supplementary Figure 5 – Genetic correlation plot

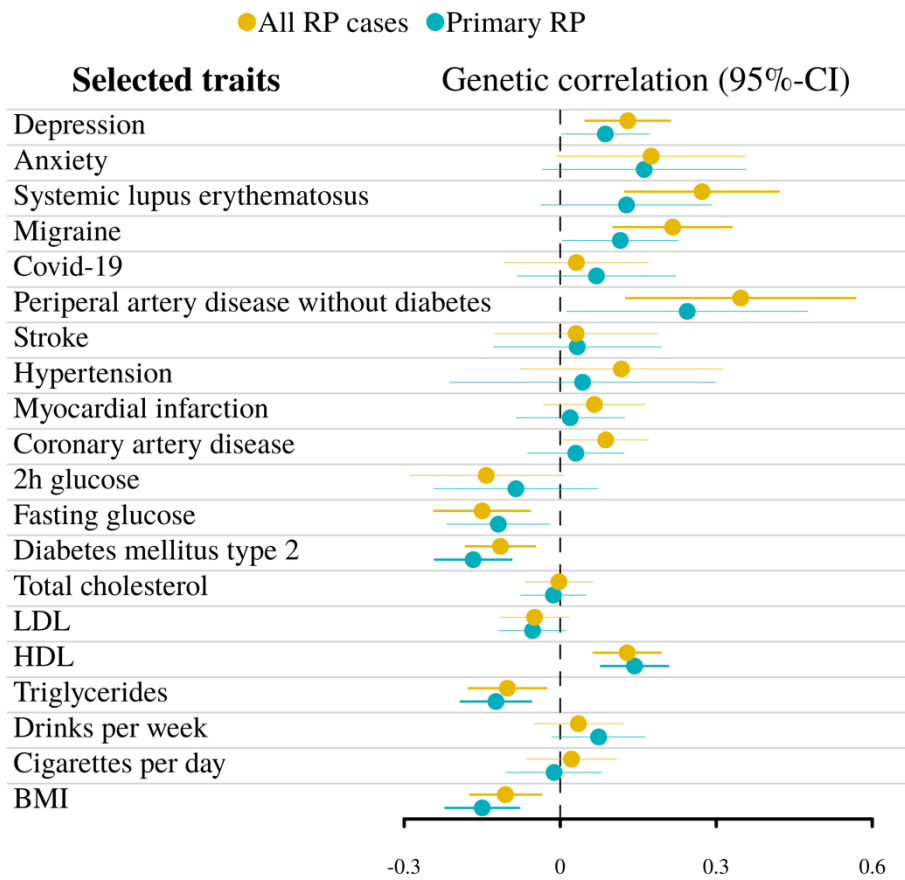

**Supplementary Figure 5 Forest plot summarizing genetic correlation analyses between RP and selected traits** Results for selected traits as listed in Supplementary Data 2. Dots indicate point estimates for genetic correlations and lines indicate 95%-confidence intervals.

## Supplementary Tables

### Supplementary Table 1 – Characteristics of cases and controls

**Supplementary Tab. 1:** Characteristics of case and control population Sample size, demographic factors, and comorbidities of Raynaud’s phenomenon (RP) cases and controls. P values were obtained using Chi-Square test for categorical variables and ANOVA for continuous variables. All p-values are two-sided.

| <i>Variable (cases/controls (in case participants did not declare an answer))</i> | <i>Participants with Raynaud’s phenomenon</i> | <i>Controls</i> | <i>p-value</i>         |
|-----------------------------------------------------------------------------------|-----------------------------------------------|-----------------|------------------------|
| <i>n</i>                                                                          | 5,147                                         | 439,294         |                        |
| <i>Age in years (mean (SD))</i>                                                   | 57.84 (7.9)                                   | 56.80 (8.0)     | $5.9 \times 10^{-7}$   |
| <i>Sex (%) [Male]</i>                                                             | 1,639 (31.8)                                  | 201,704(45.9)   | $<2.2 \times 10^{-16}$ |
| <i>BMI in m2/kg (mean (SD))</i>                                                   | 25.86 (4.6)                                   | 27.42(4.8)      | $<2.2 \times 10^{-16}$ |
| <i>Smoking (%) (9048/433817)</i>                                                  |                                               |                 | $4.3 \times 10^{-7}$   |
| <i>Never</i>                                                                      | 2,493 (50.6)                                  | 236,881 (54.1)  |                        |
| <i>Ever</i>                                                                       | 2,535 (49.4)                                  | 200,856 (45.9)  |                        |
| <i>Alcohol (%)</i>                                                                |                                               |                 | $6.5 \times 10^{-4}$   |
| <i>Never</i>                                                                      | 205 (4.0)                                     | 13,789(3.1)     |                        |
| <i>Ever</i>                                                                       | 4,937 (96.0)                                  | 425,114 (96.9)  |                        |
| <i>Diastolic blood pressure in mmHg (mean (SD))</i>                               | 80.49 (10.6)                                  | 82.22 (10.7)    | $<2.2 \times 10^{-16}$ |
| <i>Systolic blood pressure in mmHg (mean (SD))</i>                                | 138.91 (20.2)                                 | 140.03 (19.6)   | $1.3 \times 10^{-4}$   |
| <i>Town Deprivation Index (mean (SD))</i>                                         | -1.42 (3.0)                                   | -1.49 (3.0)     | 0.131                  |
| <i>Household income in Pound (%)</i>                                              |                                               |                 | $<2.2 \times 10^{-16}$ |
| <i>Less than 30,999</i>                                                           | 2,527 (49.3)                                  | 180,752 (41.3)  |                        |
| <i>31,000 to 100,000</i>                                                          | 1,658 (32.3)                                  | 177,331 (40.5)  |                        |
| <i>Greater than 100,000</i>                                                       | 116 (2.3)                                     | 20,216 (4.6)    |                        |
| <i>Not declared</i>                                                               | 827 (16.1)                                    | 59,498 (13.6)   |                        |
| <i>Migraine (%)</i>                                                               | 519 (10.1)                                    | 19,287 (4.4)    | $<2.2 \times 10^{-16}$ |
| <i>Hypertension (%)</i>                                                           | 2,190 (42.5)                                  | 144,872 (33.0)  | $<2.2 \times 10^{-16}$ |
| <i>Type 1 Diabetes mellitus (%)</i>                                               | 60 (1.2)                                      | 4,058 (0.9)     | $8.4 \times 10^{-2}$   |
| <i>Type 2 Diabetes mellitus (%)</i>                                               | 381 (7.4)                                     | 36,770 (8.4)    | 0.014                  |
| <i>Other chronic ischemic heart disease (%)</i>                                   | 601 (11.7)                                    | 29,892 (6.8)    | $<2.2 \times 10^{-16}$ |
| <i>Systemic Lupus Erythematosus (%)</i>                                           | 131 (2.5)                                     | 528 (0.1)       | $<2.2 \times 10^{-16}$ |
| <i>Systemic Sclerosis (%)</i>                                                     | 229 (4.4)                                     | 148 (0.0)       | $<2.2 \times 10^{-16}$ |

Supplementary Table 2 – OR for sex and sex\*SNP interaction

**Supplementary Tab. 2:** OR for variants for men and women separately as well as p-value for sex\*SNP interaction term. Statistics were derived using logistic regression models.

| SNP               | Alleles | Frequency | GWAS    | OR women | CI lower women | CI upper women | p-value women | OR men | CI lower men | CI upper men | p-value men | p-value interaction |
|-------------------|---------|-----------|---------|----------|----------------|----------------|---------------|--------|--------------|--------------|-------------|---------------------|
| <i>rs7090046</i>  | A/G     | 0.31      | all     | 1.28     | 1.21           | 1.36           | 1.01e-18      | 1.20   | 1.11         | 1.31         | 7.97e-06    | 0.20                |
| <i>rs12653958</i> | A/G     | 0.30      | all     | 1.14     | 1.07           | 1.20           | 8.58e-06      | 1.20   | 1.11         | 1.30         | 1.23e-05    | 0.28                |
| <i>rs3094013</i>  | G/A     | 0.14      | all     | 1.15     | 1.07           | 1.24           | 1.24e-04      | 1.23   | 1.11         | 1.37         | 6.48e-05    | 0.31                |
| <i>rs1343449</i>  | A/G     | 0.32      | primary | 1.30     | 1.22           | 1.39           | 3.64e-14      | 1.19   | 1.09         | 1.30         | 1.71e-04    | 0.13                |
| <i>rs72731435</i> | T/C     | 0.30      | primary | 1.17     | 1.09           | 1.26           | 9.39e-06      | 1.23   | 1.12         | 1.35         | 9.88e-06    | 0.41                |

OR = odds ratio; CI = confidence interval; GWAS = type of outcome, all – all RP cases, primary – excluding secondary RP cases



Supplementary Table 3 – Effect estimates for all and primary RP cases

**Supplementary Tab. 3:** Comparison of effect estimates for genetic variants associated with RP between all and primary cases. Statistics were derived from logistic regression models.

| Variant    |                   |           |         |           | GWAS of all RP (N = 444,441, 5147 cases and 435,357 controls) |             |          | GWAS of Primary RP(N = 441,542, 3505 cases and 435,357 controls) |             |          |
|------------|-------------------|-----------|---------|-----------|---------------------------------------------------------------|-------------|----------|------------------------------------------------------------------|-------------|----------|
| SNP        | Chromosome number | Position  | Alleles | Frequency | OR                                                            | CI          | P value  | OR                                                               | CI          | P value  |
| rs12653958 | 5                 | 4032849   | A/G     | 0.30      | 1.17                                                          | (1.12;1.22) | 4.76E-13 | 1.20                                                             | (1.14;1.27) | 1.69E-12 |
| rs72731435 | 5                 | 4048526   | T/C     | 0.30      | 1.17                                                          | (1.12;1.22) | 5.85E-13 | 1.20                                                             | (1.14;1.27) | 1.46E-12 |
| rs3094013  | 6                 | 31434366  | G/A     | 0.14      | 1.18                                                          | (1.11;1.24) | 9.73E-09 | 1.10                                                             | (1.03;1.18) | 5.40E-03 |
| rs1343449  | 10                | 112860526 | A/G     | 0.32      | 1.26                                                          | (1.20;1.31) | 1.85E-26 | 1.29                                                             | (1.23;1.36) | 4.04E-23 |
| rs7090046  | 10                | 112860930 | G/A     | 0.31      | 1.26                                                          | (1.21;1.32) | 9.58E-27 | 1.29                                                             | (1.23;1.36) | 6.39E-23 |

Supplementary Table 4 – Latent causal variable analysis

Results from latent causal variable analysis for phecodes with evidence of significant genetic correlations ( $rg$ )

| <b><i>T1</i></b>    | <b><i>Phecodes</i></b> | <b><i>rg</i></b> | <b><i>SE(rg)</i></b> | <b><i>p.fdr(rg)</i></b> | <b><i>GCP</i></b> | <b><i>SE(GCP)</i></b> | <b><i>p.fdr(GCP)</i></b> |
|---------------------|------------------------|------------------|----------------------|-------------------------|-------------------|-----------------------|--------------------------|
| <i>All RP cases</i> | Osteoporosis NOS       | 0.40             | 0.08                 | 1.36E-04                | 0.72              | 0.19                  | 1.58E-03                 |
| <i>Primary RP</i>   | Osteoporosis NOS       | 0.35             | 0.09                 | 7.93E-03                | 0.66              | 0.22                  | 1.17E-02                 |
