# Supplementary material for: ADRA2A and IRX1 are putative risk genes for Raynaud’s phenomenon
Source: PubMed Central journal article supplement (PMC10570309; doi:10.1038/s41467-023-41876-5), 2023-10-12
Supplement: 41467_2023_41876_MOESM3_ESM.pdf [file 41467_2023_41876_MOESM3_ESM.pdf]

## **Description of Additional Supplementary Files**

File Name: Supplementary Data 1

Description: Results from cis-eQTL mapping for regional sentinels for Raynaud's syndrome; Statistics for RP were derived from logistic regression models and statistics for gene expression derived from linear regression models.

File Name: Supplementary Data 2

Description: Sources of publicly available GWAS.

File Name: Supplementary Data 3

Description: Results from genetic correlation analysis using selected traits.

File Name: Supplementary Data 4

Description: Results from genetic correlation analysis across 185 phecodes with two-sided tests of significance.

File Name: Supplementary Data 5

Description: Summary of genetically prioritized drug targets and drugs in trials for Raynaud's phenomenon.

File Name: Supplementary Data 6

Description: Electronic health records codes for identification of used conditions and diseases.
